# Supplementary material
Source: HighWire-hosted journal article supplement (https://jnm.snmjournals.org/highwire/filestream/94728/field_highwire_adjunct_files/0/160614_Supplemental_Data.pdf)
Supplement: 160614_Supplemental_Data.pdf [file 160614_Supplemental_Data.pdf]

A)

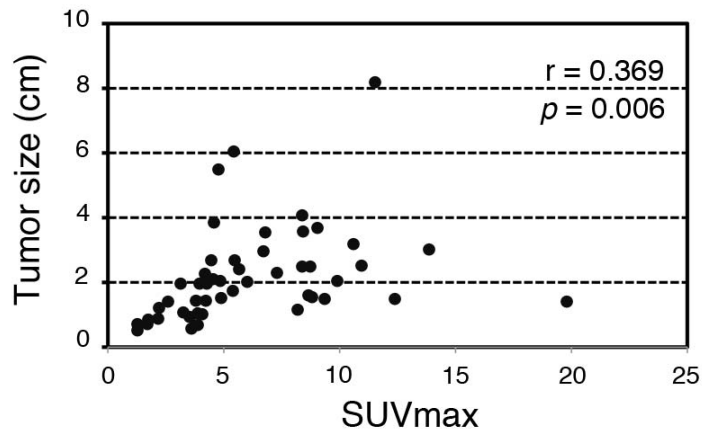

B)

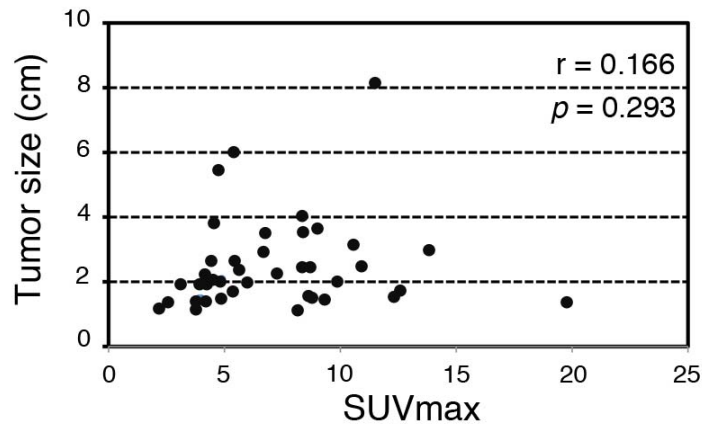

Supplemental Figure 1. A) Scatter plot of tumor size and  $^{18}\text{F}$ -FDG accumulation with all liver tumors ( $n = 55$ ). SUVmax was significantly correlated with tumor size ( $r = 0.369$ ,  $P = 0.006$ ). B) Scatter plot of tumor size and  $^{18}\text{F}$ -FDG accumulation with liver tumors larger than 10mm ( $n = 42$ ). SUVmax was not significantly correlated with tumor size ( $r = 0.166$ ,  $P = 0.293$ ). The relationship between variables was determined by Pearson's correlation coefficient.

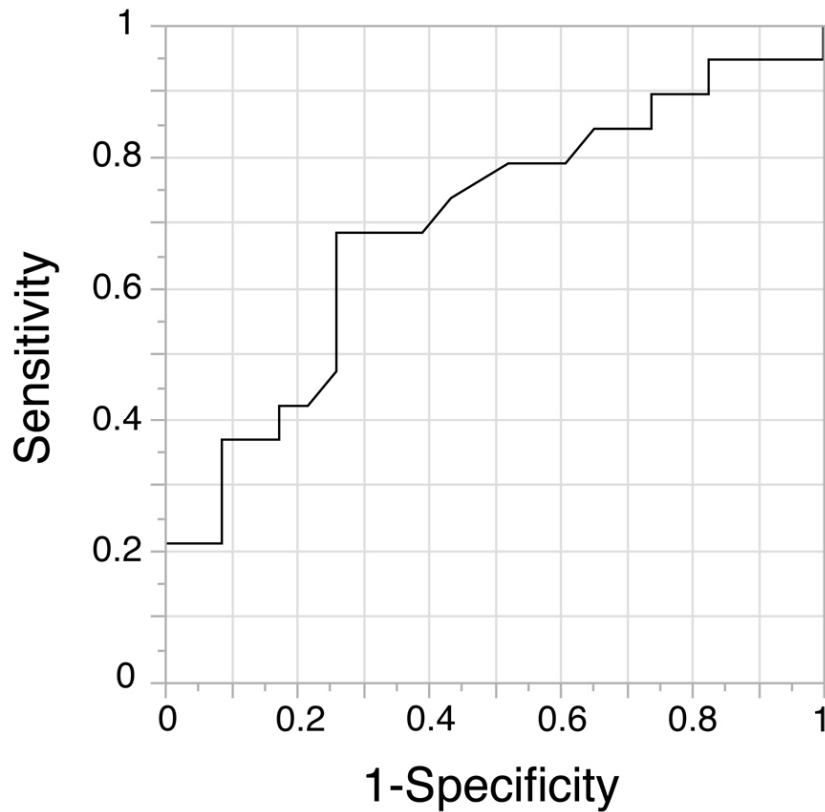

Supplemental Figure 2. The receiver operating characteristics curve of SUVmax. The area under the curve was 0.70. A cutoff value of SUVmax of 6.0 showed a sensitivity of 68% and a specificity of 74% for the prediction of *KRAS* mutations.
